# Supplementary material for: Deletion of Interleukin-1β Converting Enzyme Alters Mouse Cardiac Structure and Function
Source: MDPI journal article supplement (doi:10.3390/biology13030172), 2024-03-07
Supplement: s1 [file s1]

# Deletion of interleukin-1 $\beta$ converting enzyme alters mouse cardiac structure and function

Gohar Azhar <sup>1\*</sup>, Koichiro Nagano <sup>1</sup>, Pankaj Patyal <sup>1</sup>, Xiaomin Zhang <sup>1</sup>, Ambika Verma <sup>1</sup>, and Jeanne Y. Wei <sup>1</sup>

<sup>1</sup>Donald W. Reynolds Department of Geriatrics and Institute on Aging, University of Arkansas for Medical Sciences, Little Rock, AR 72205, USA.

## Supplementary Figures

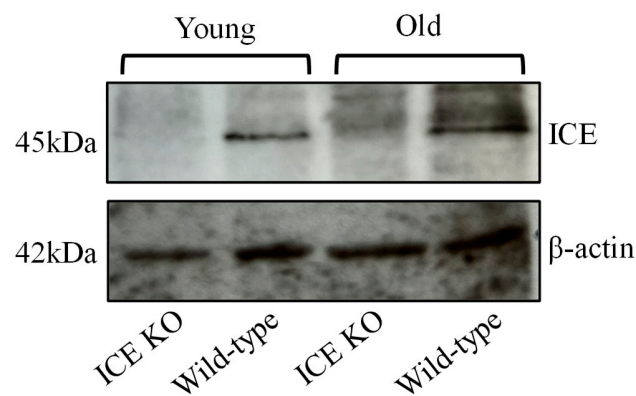

**Figure S1.** Western blot analysis of ICE deletion. Representative immunoblots of ICE from mouse heart left ventricular tissue. Western blots confirmed no ICE protein expression in ICE KO at young (4-6 months old) and old age (18-24 months old) mice heart tissues.  $\beta$ -actin was used as a loading control.
